# Supplementary material
Source: PubMed Central journal article supplement (PMC10210228)

**Supplementary Figure 1. Dystrophin immunofluorescence staining in respiratory muscles.**

**A**, Wild type (WT) diaphragm; **B**, Mdx diaphragm; **C**, AAV9.micro-dystrophin treated mdx (AAV- $\mu$ Dys) diaphragm; **D**, Mdx abdominal muscle; **E**, AAV9.micro-dystrophin treated mdx (AAV- $\mu$ Dys) abdominal muscle; **F**, Mdx intercostal muscle; **F**, AAV9.micro-dystrophin treated mdx (AAV- $\mu$ Dys) intercostal muscle.

# A WT, Diaphragm

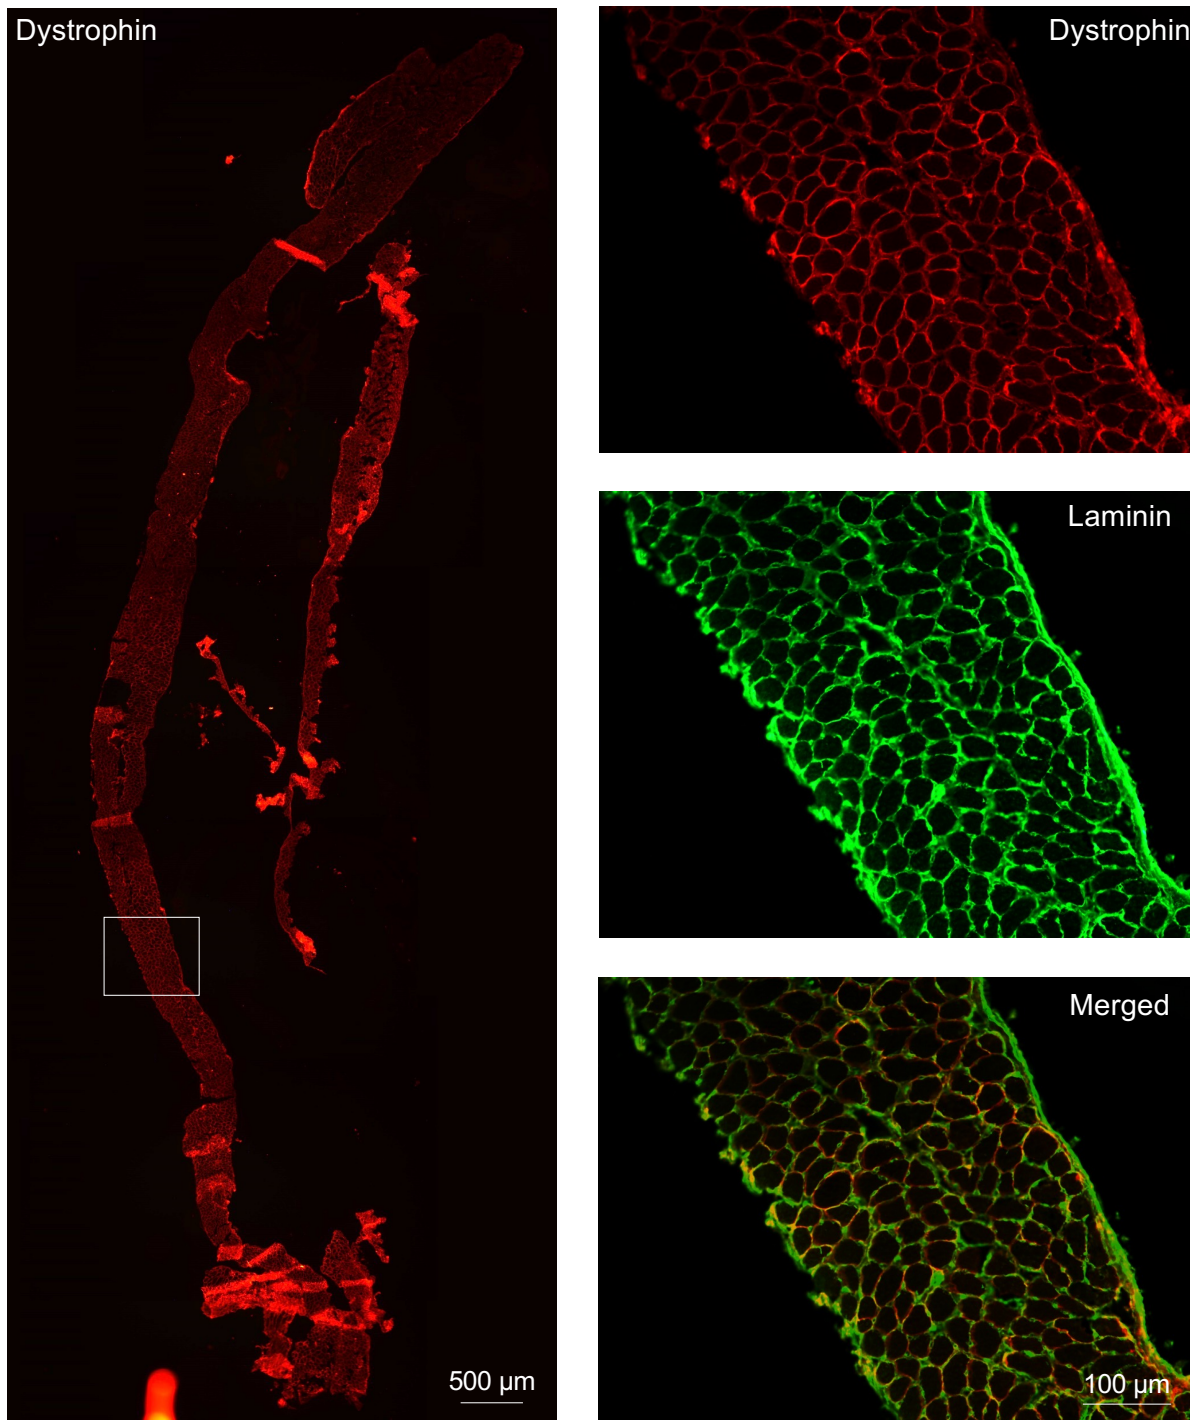

**B**

mdx, Diaphragm

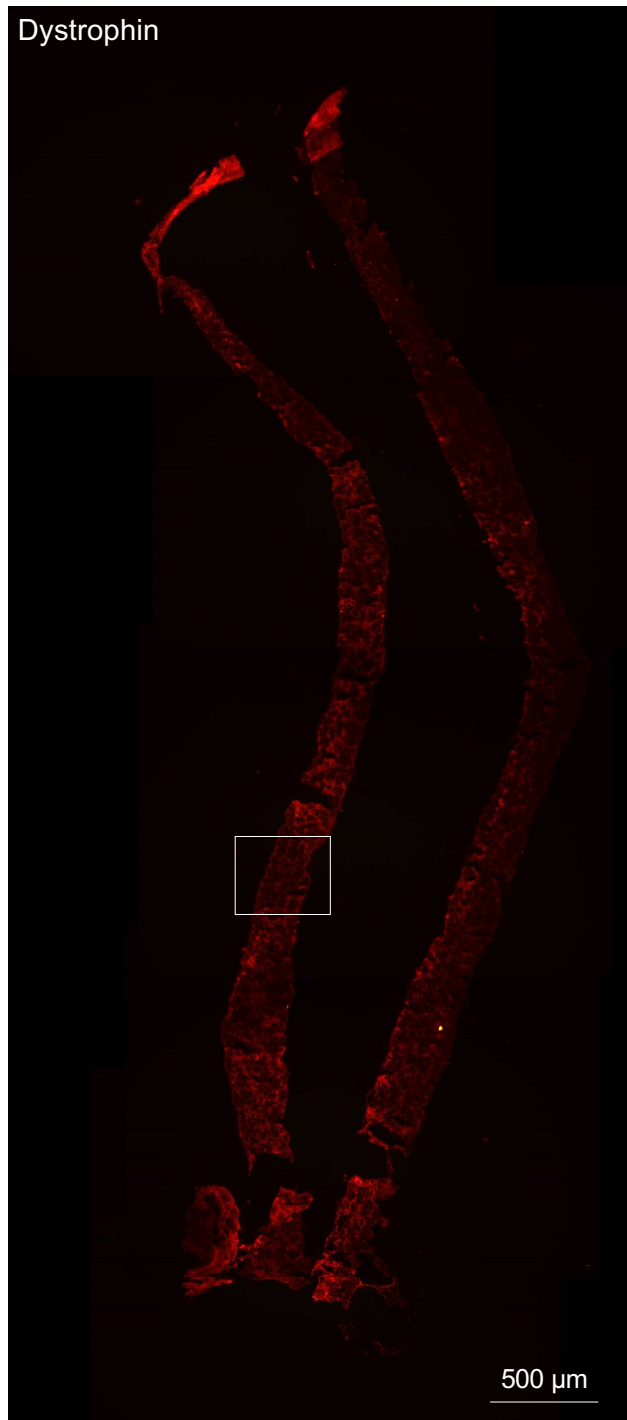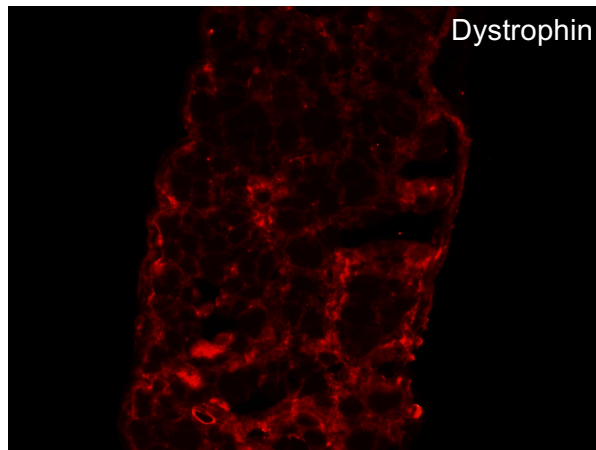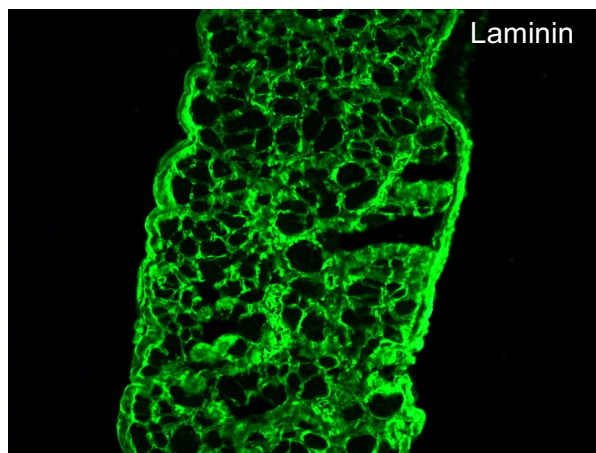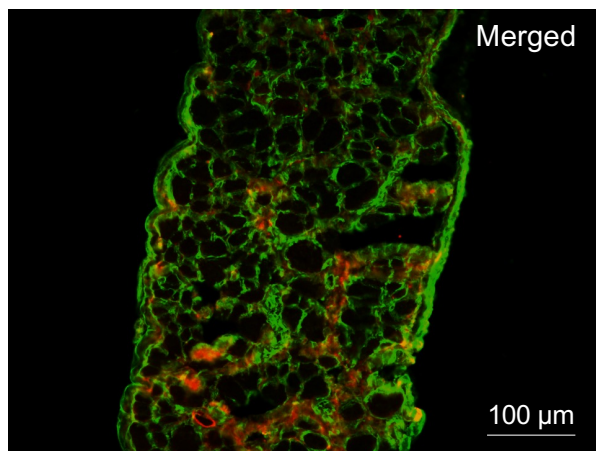

# C AAV- $\mu$ Dys, Diaphragm

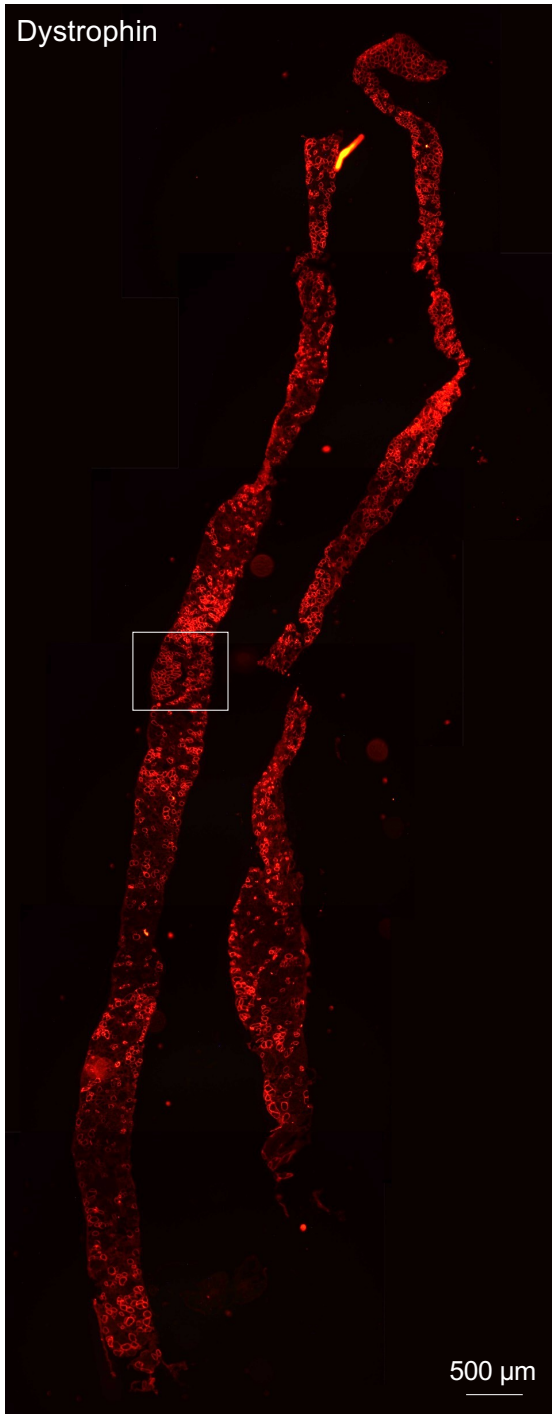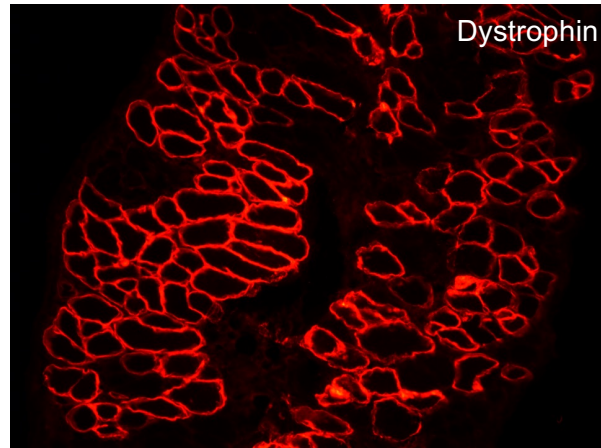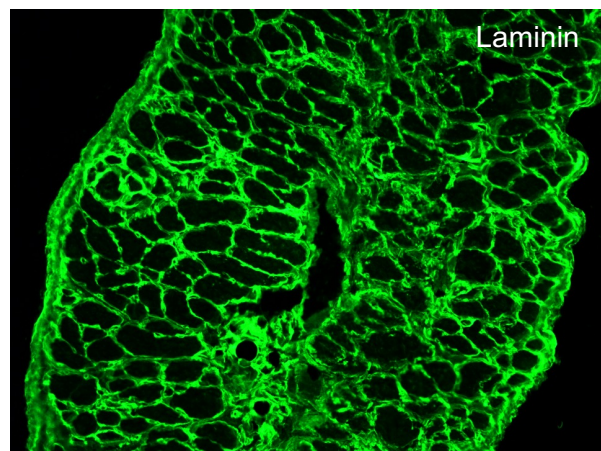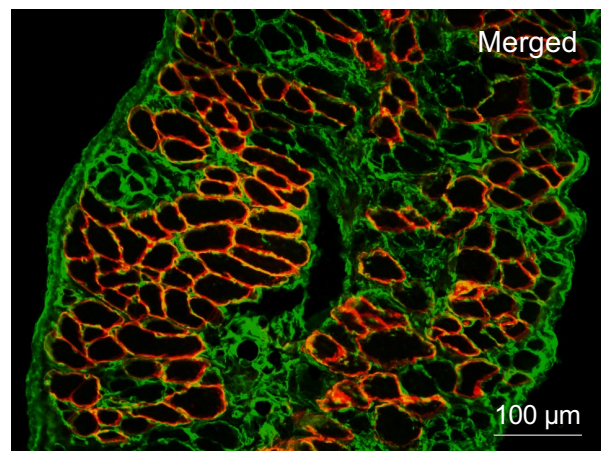

**D** mdx, Abdominal muscle

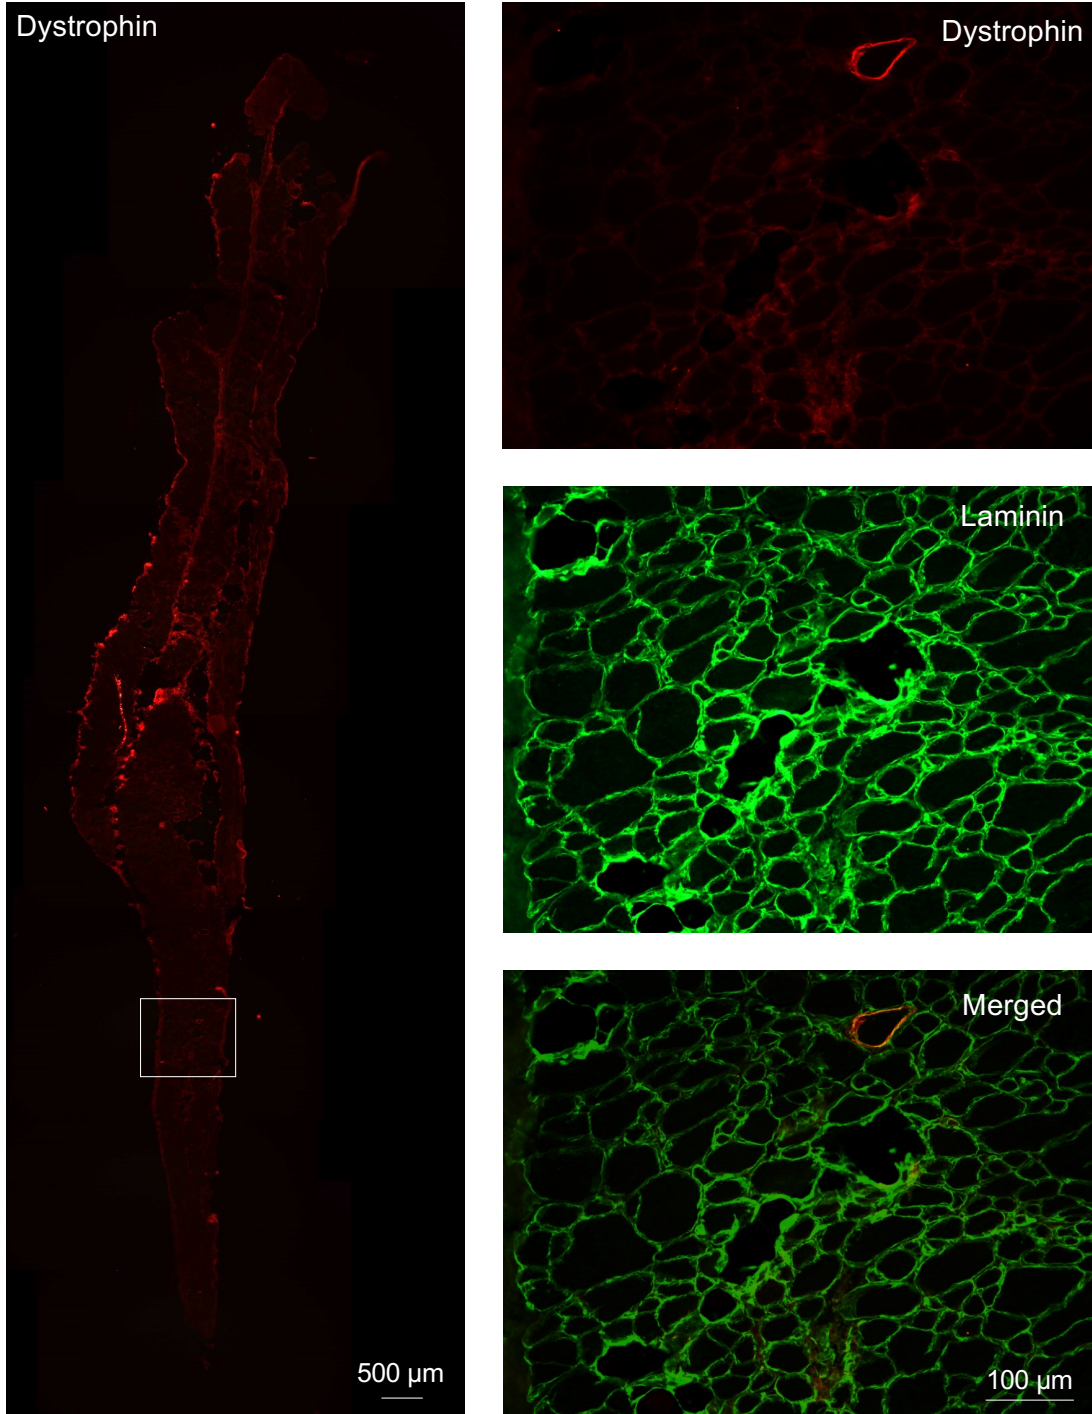

**E**

# AAV- $\mu$ Dys, Abdominal muscle

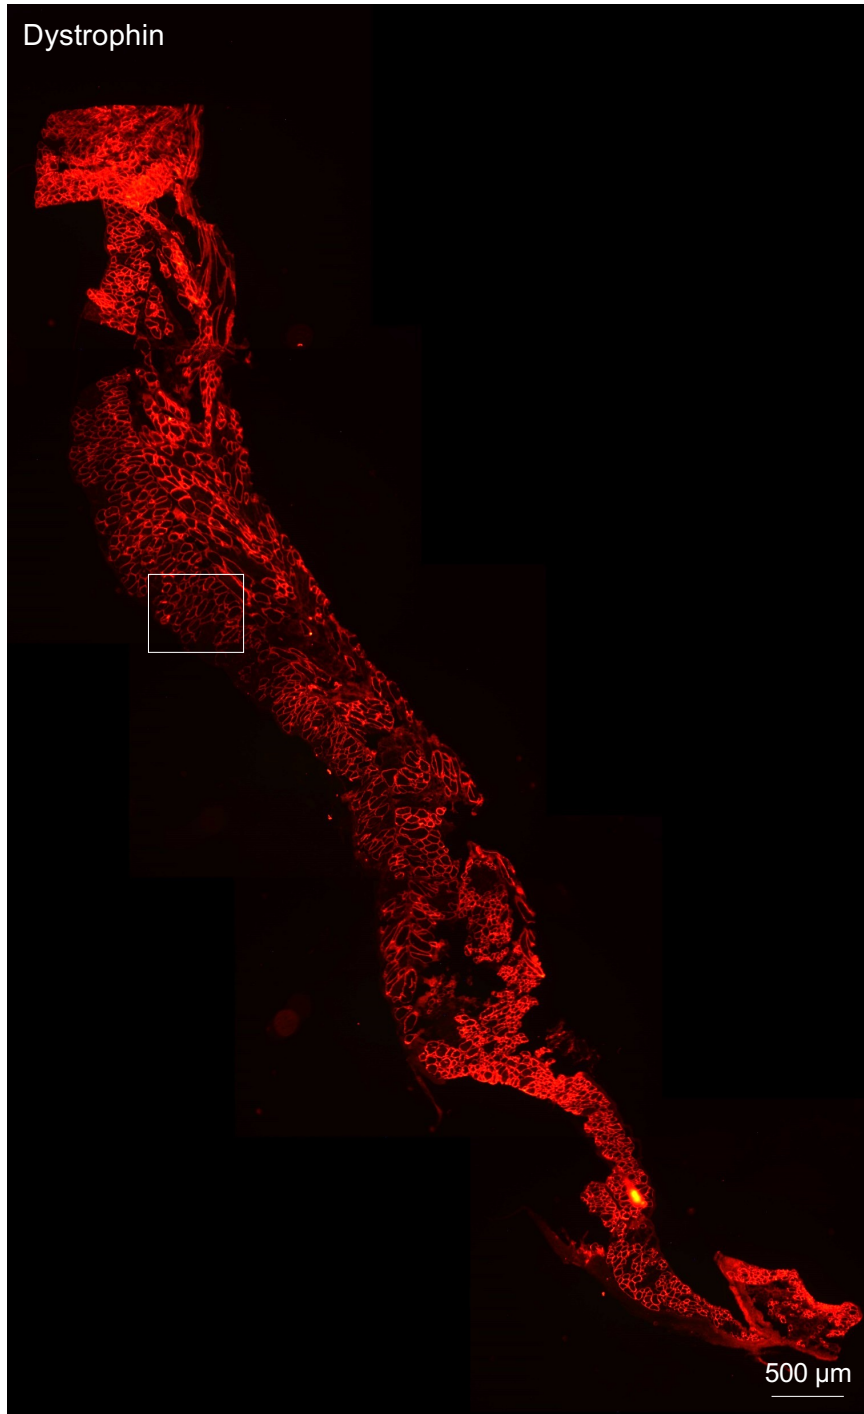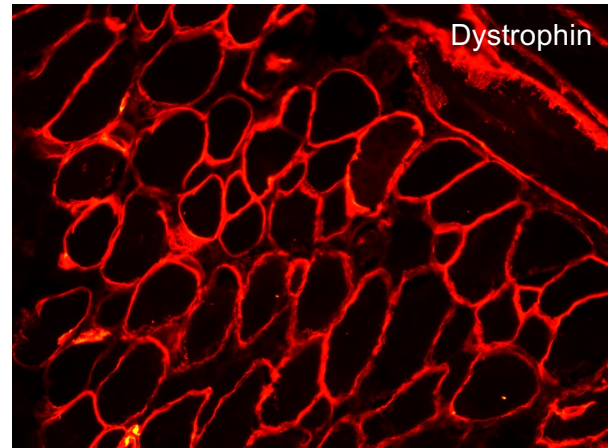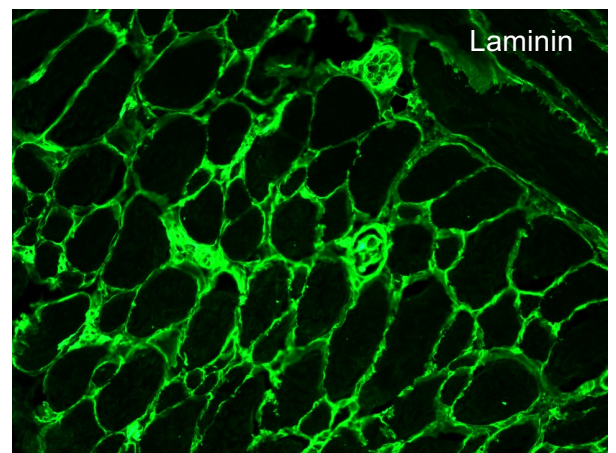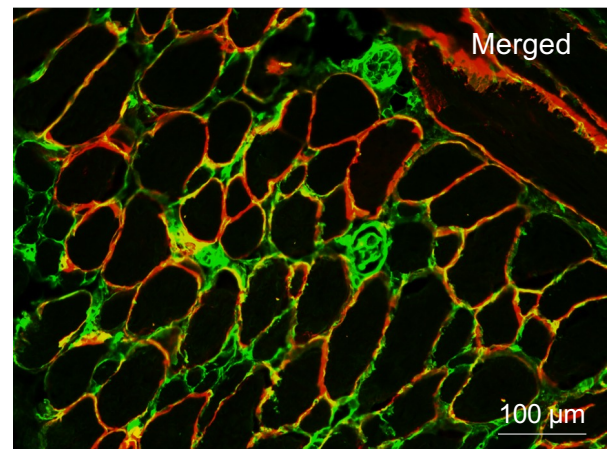

**F**

mdx, Intercostal muscle

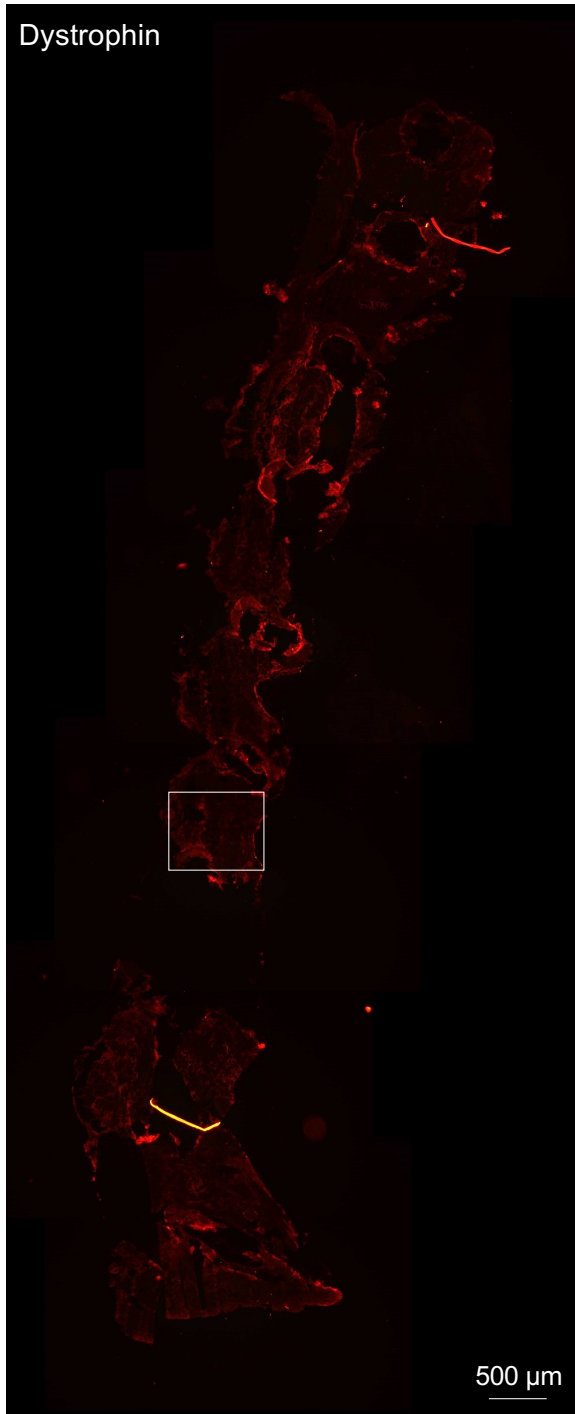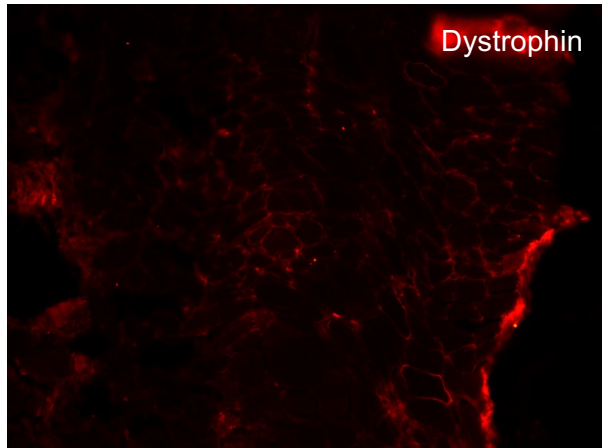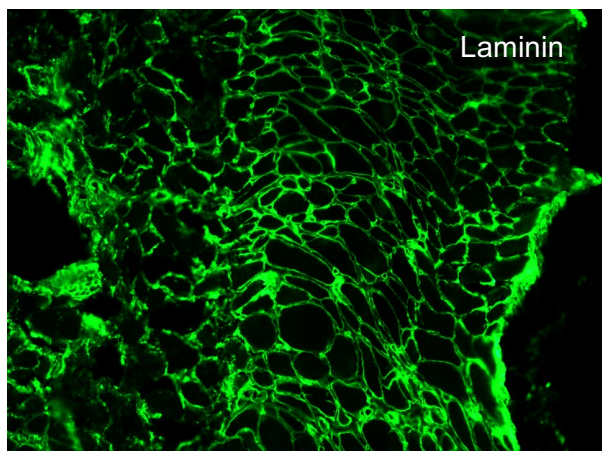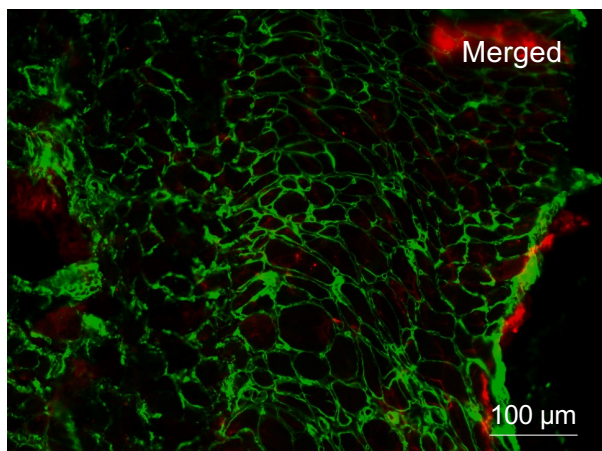

# G AAV- $\mu$ Dys, Intercostal muscle

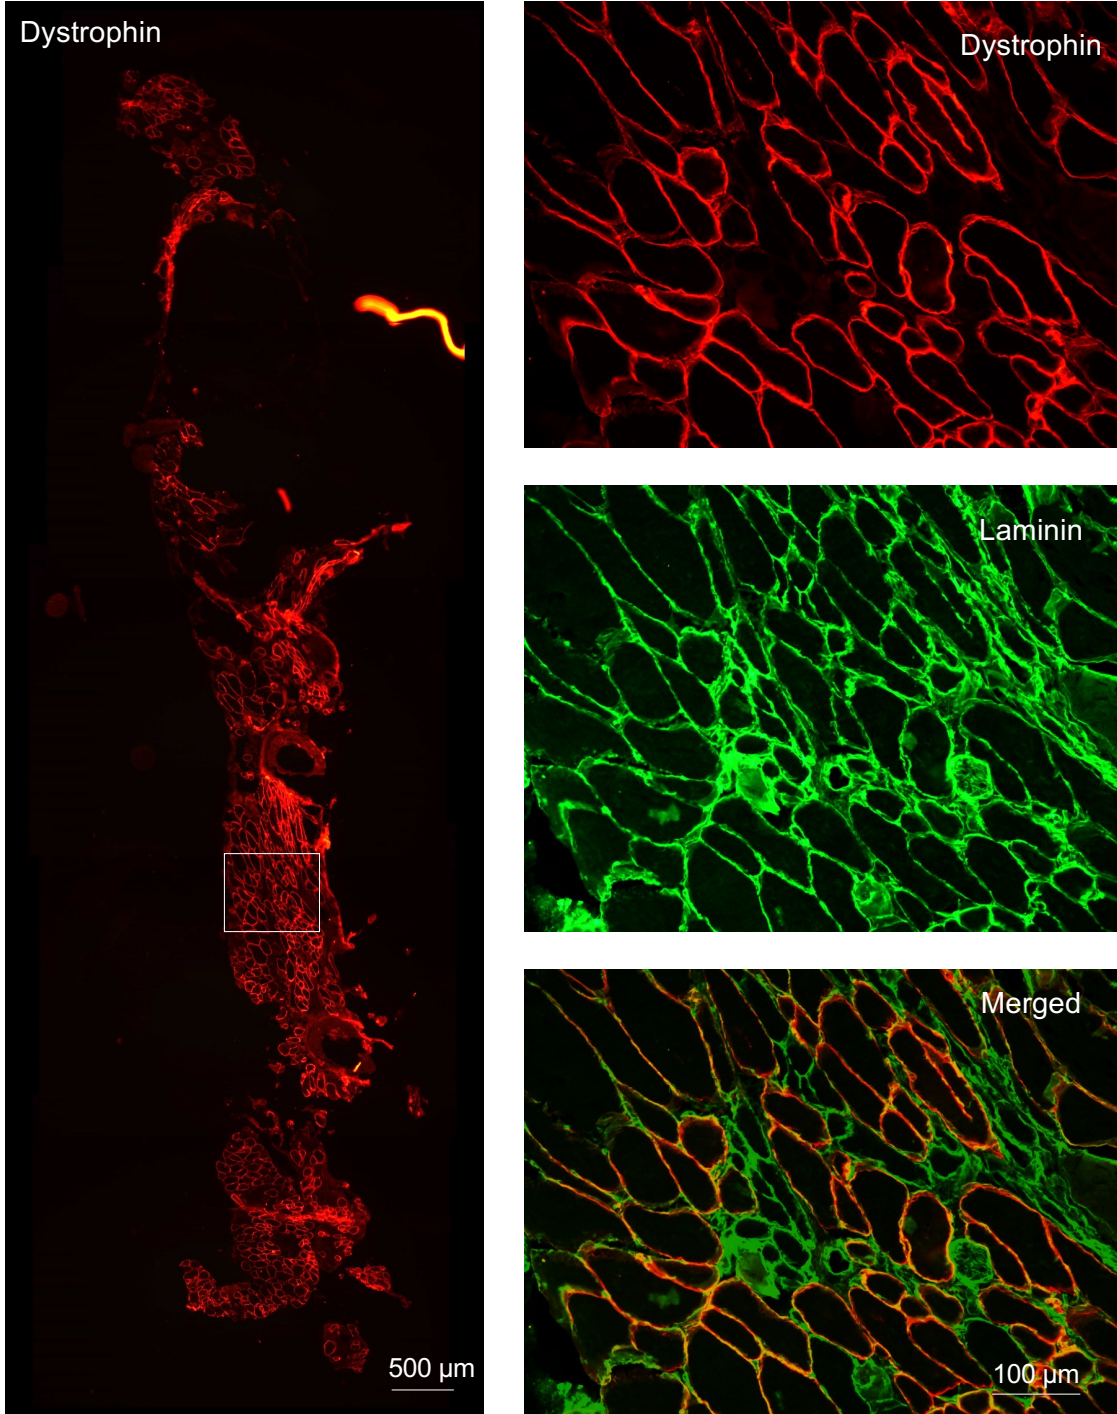

Supplement: Supp_FigS1.pdf [file Supp_FigS1.pdf]
