# Supplementary material
Source: PubMed Central journal article supplement (PMC10210228)
Supplement: Supp_FigS2.pdf [file Supp_FigS2.pdf]

**Supplementary Figure 2. Original uncropped western blots showed in Figure 1D.** The red-outlined region is the cropped region shown in Figure 1. **A**, skeletal muscle; **B**, heart.

A

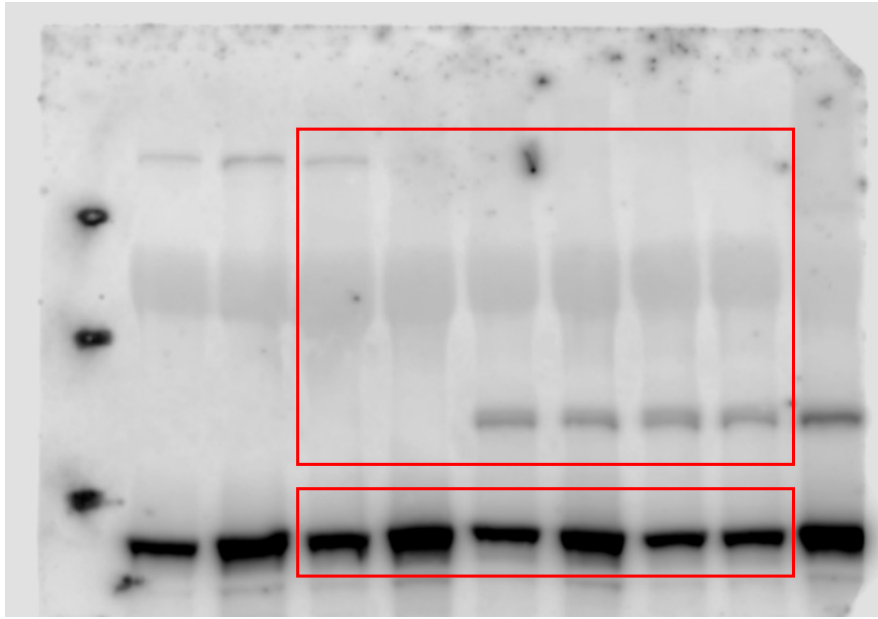

Skeletal muscle western blot in Figure 1D. Red-outlined area is cropped to show in the main figure.

B

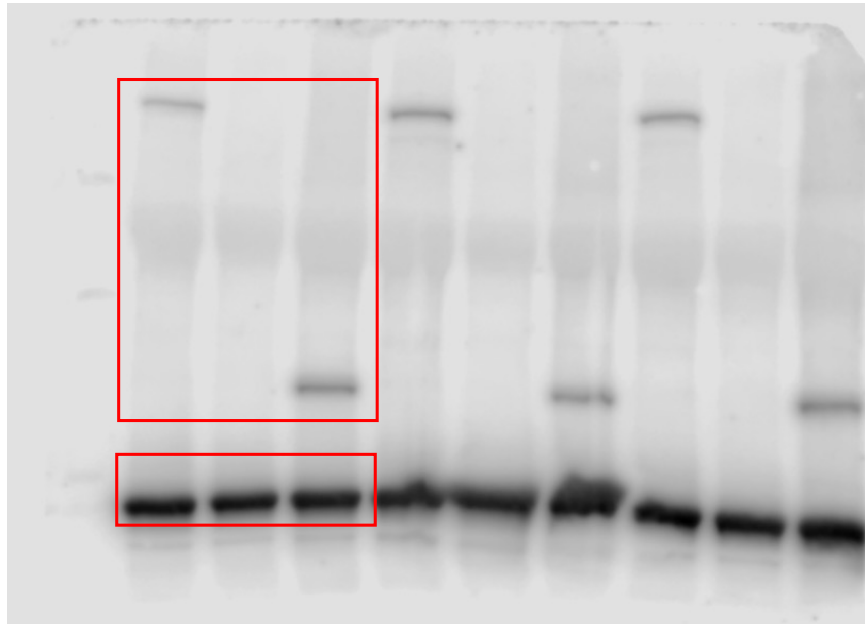

Heart western blot in Figure 1E. Red-outlined area is cropped to show in the main figure.
