# Supplementary material
Source: PubMed Central journal article supplement (PMC10210228)

**Supplementary Figure 3. Full-view histological evaluation of the heart, tibialis anterior**

**(TA), and Quadriceps. A,** Representative HE staining photomicrographs of the whole heart cross-section from wild type (WT), mdx, and AAV9.micro-dystrophin treated mdx (AAV- $\mu$ Dys) mice at 21 months of age. **B,** Representative Masson trichrome staining photomicrographs of the whole heart cross-section from wild type (WT), mdx, and AAV9.micro-dystrophin treated mdx (AAV- $\mu$ Dys) mice at 21 months of age. **C,** Representative HE staining photomicrographs of the whole TA muscle cross-section from wild type (WT), mdx and AAV9.micro-dystrophin treated mdx (AAV- $\mu$ Dys) mice at 21 months of age. **D,** Representative Masson trichrome staining photomicrographs of the whole TA muscle cross-section from wild type (WT), mdx, and AAV9.micro-dystrophin treated mdx (AAV- $\mu$ Dys) mice at 21 months of age. **E,** Representative high-power photomicrographs of Masson trichrome staining and HE staining from quadriceps muscles of wild type (WT), mdx and AAV9.micro-dystrophin treated mdx (AAV- $\mu$ Dys) mice at 21 months of age. The yellow triangle marks the same myofiber in serial sections. **F,** Representative HE staining photomicrographs of the whole quadriceps muscle cross-section from wild type (WT), mdx, and AAV9.micro-dystrophin treated mdx (AAV- $\mu$ Dys) mice at 21 months of age. **G,** Representative Masson trichrome staining photomicrographs of the whole quadriceps muscle cross-section from wild type (WT), mdx, and AAV9.micro-dystrophin treated mdx (AAV- $\mu$ Dys) mice at 21 months of age.

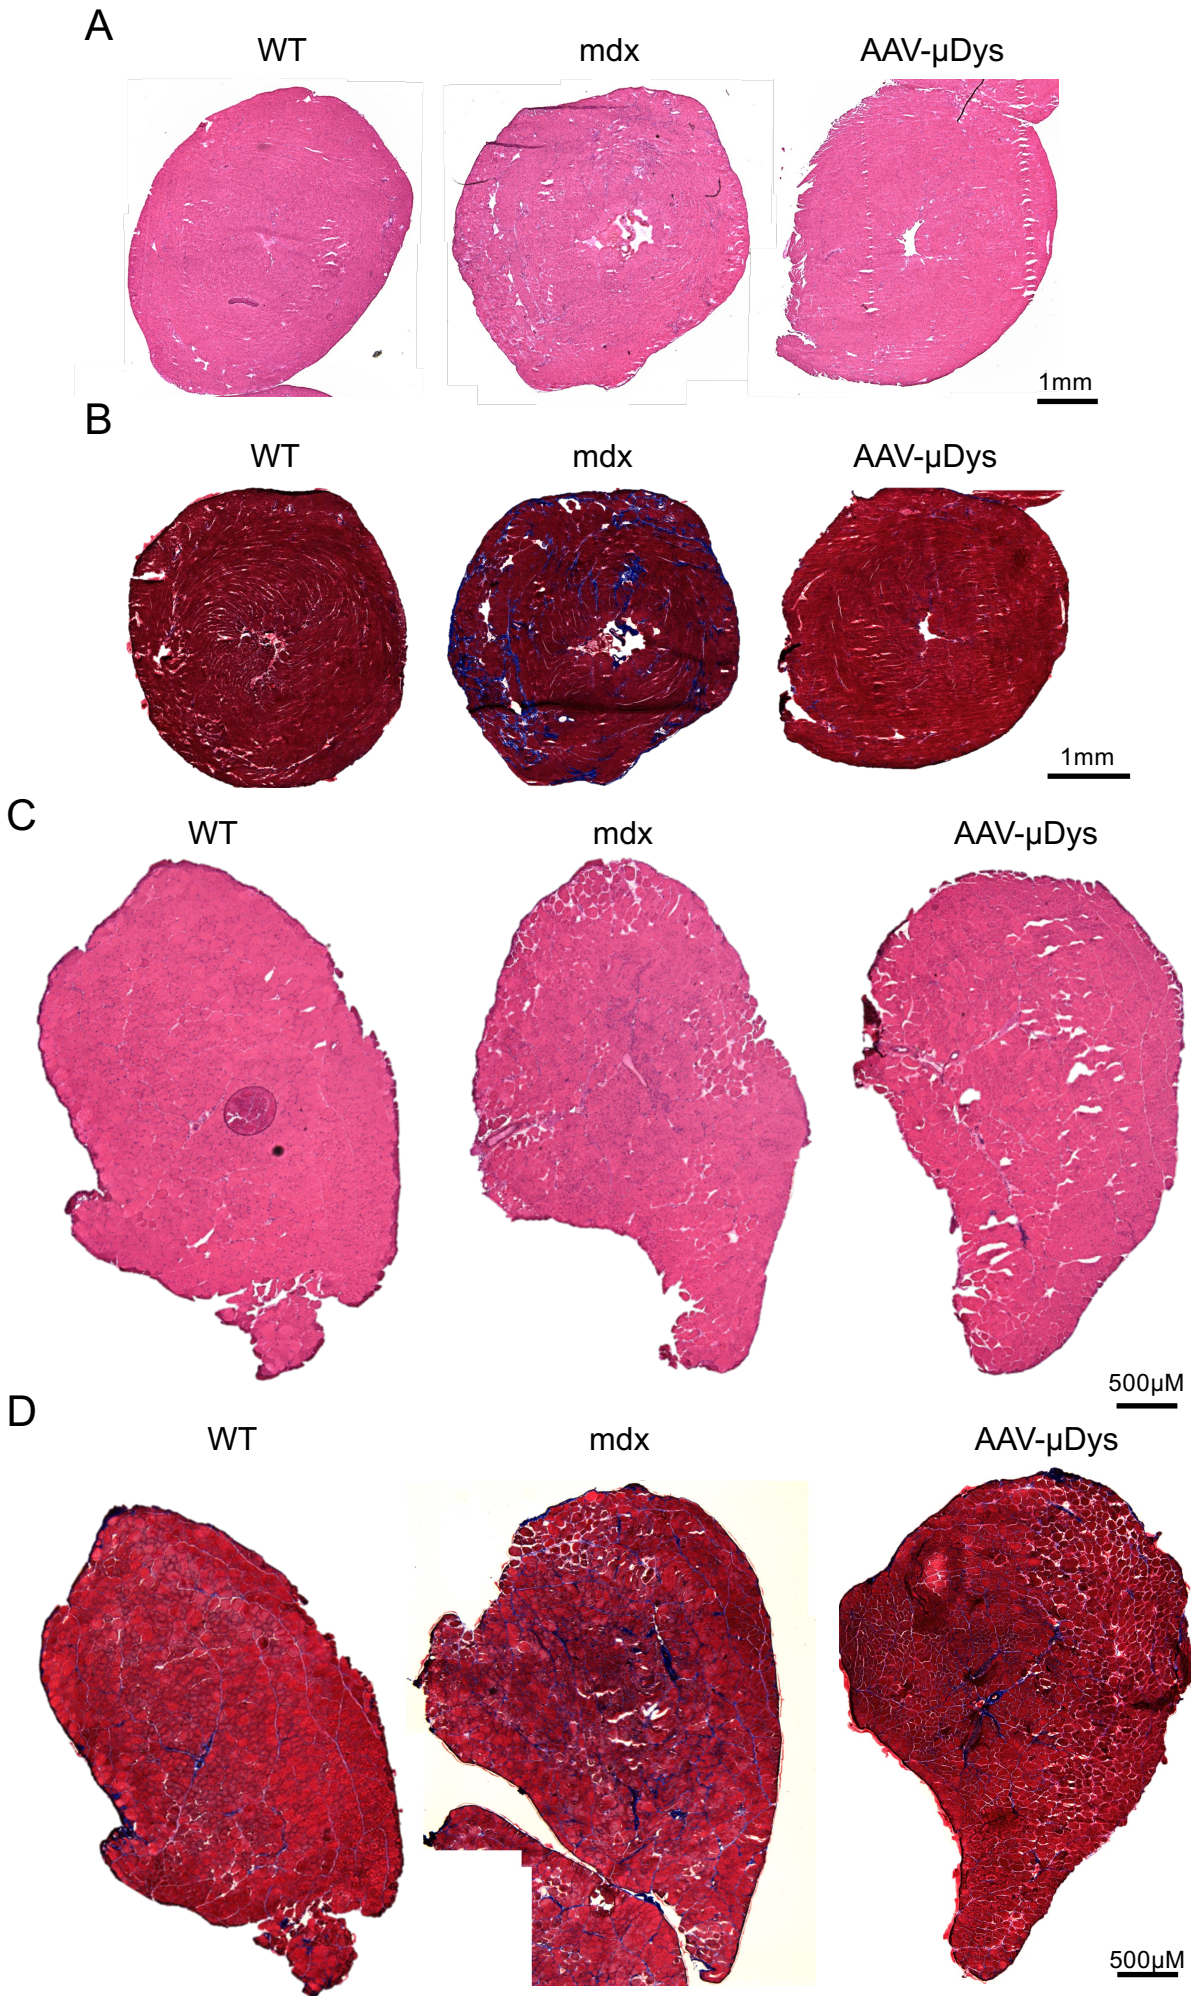

E

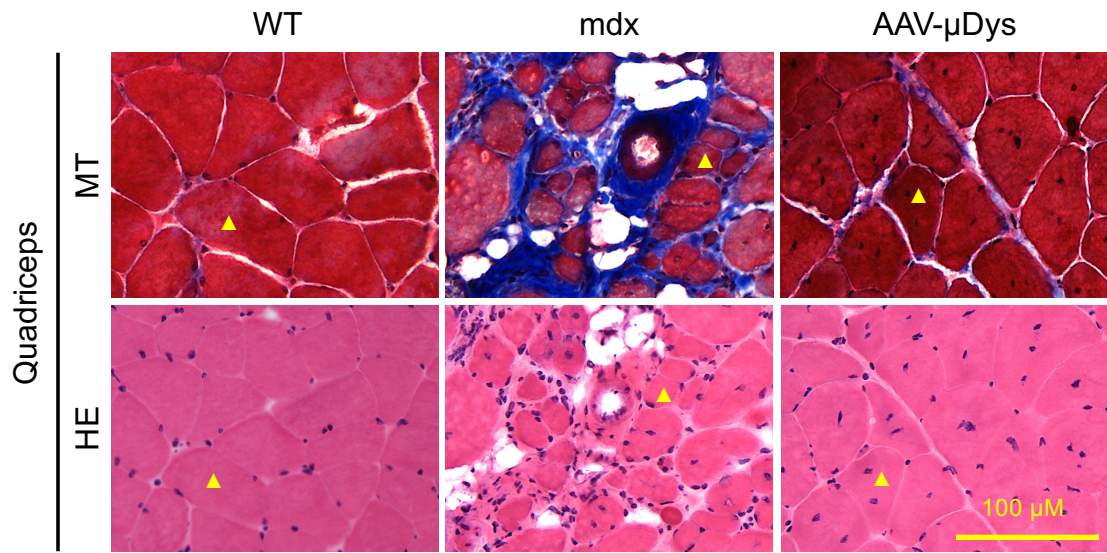

E

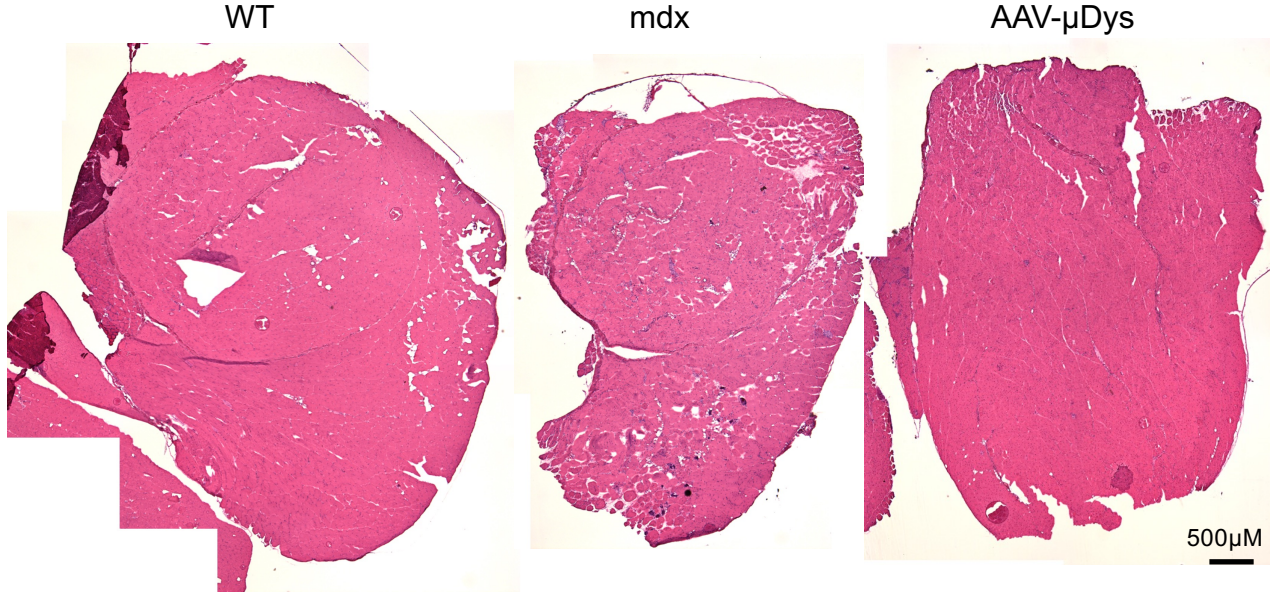

F

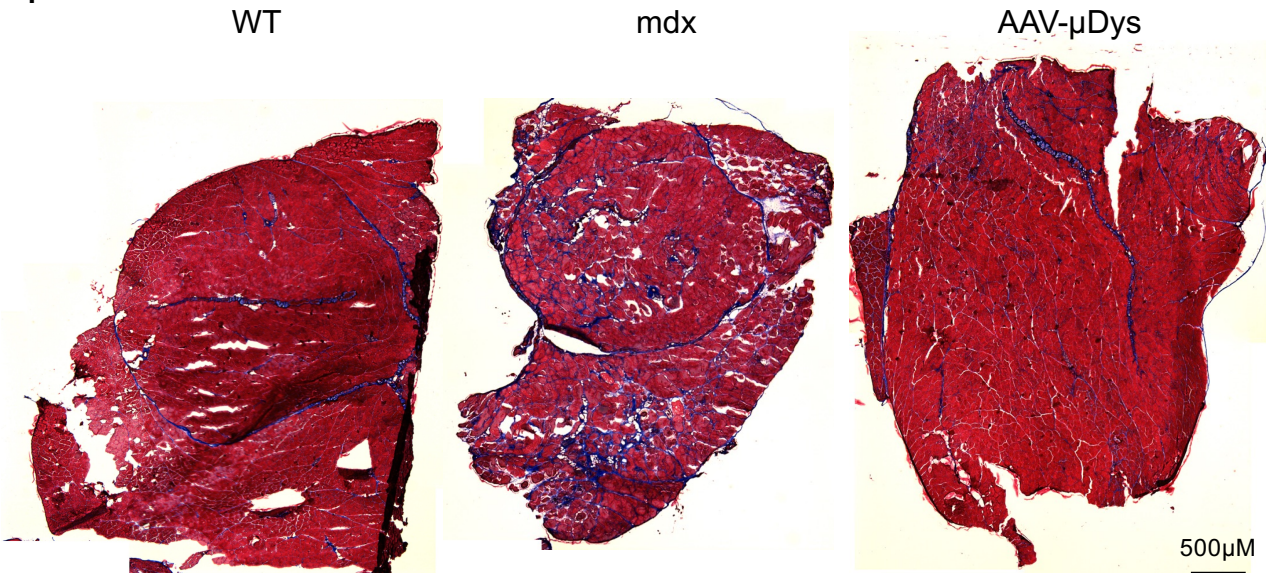

Supplement: Supp_FigS3.pdf [file Supp_FigS3.pdf]
