# Supplementary material
Source: PubMed Central journal article supplement (PMC10210228)

**Supplementary Figure 4. AAV9.micro-dystrophin treated mice showed significant improvements in cardiac ECG 8-months post-treatment.** Quantitative ECG parameters from wild-type, mdx, and AAV9.micro-dystrophin treated mdx (AAV- $\mu$ Dys) at 11 months of age.

● Wild type (n=9)   ■ mdx (n=9)   ▲ AAV-μDys (n=11)

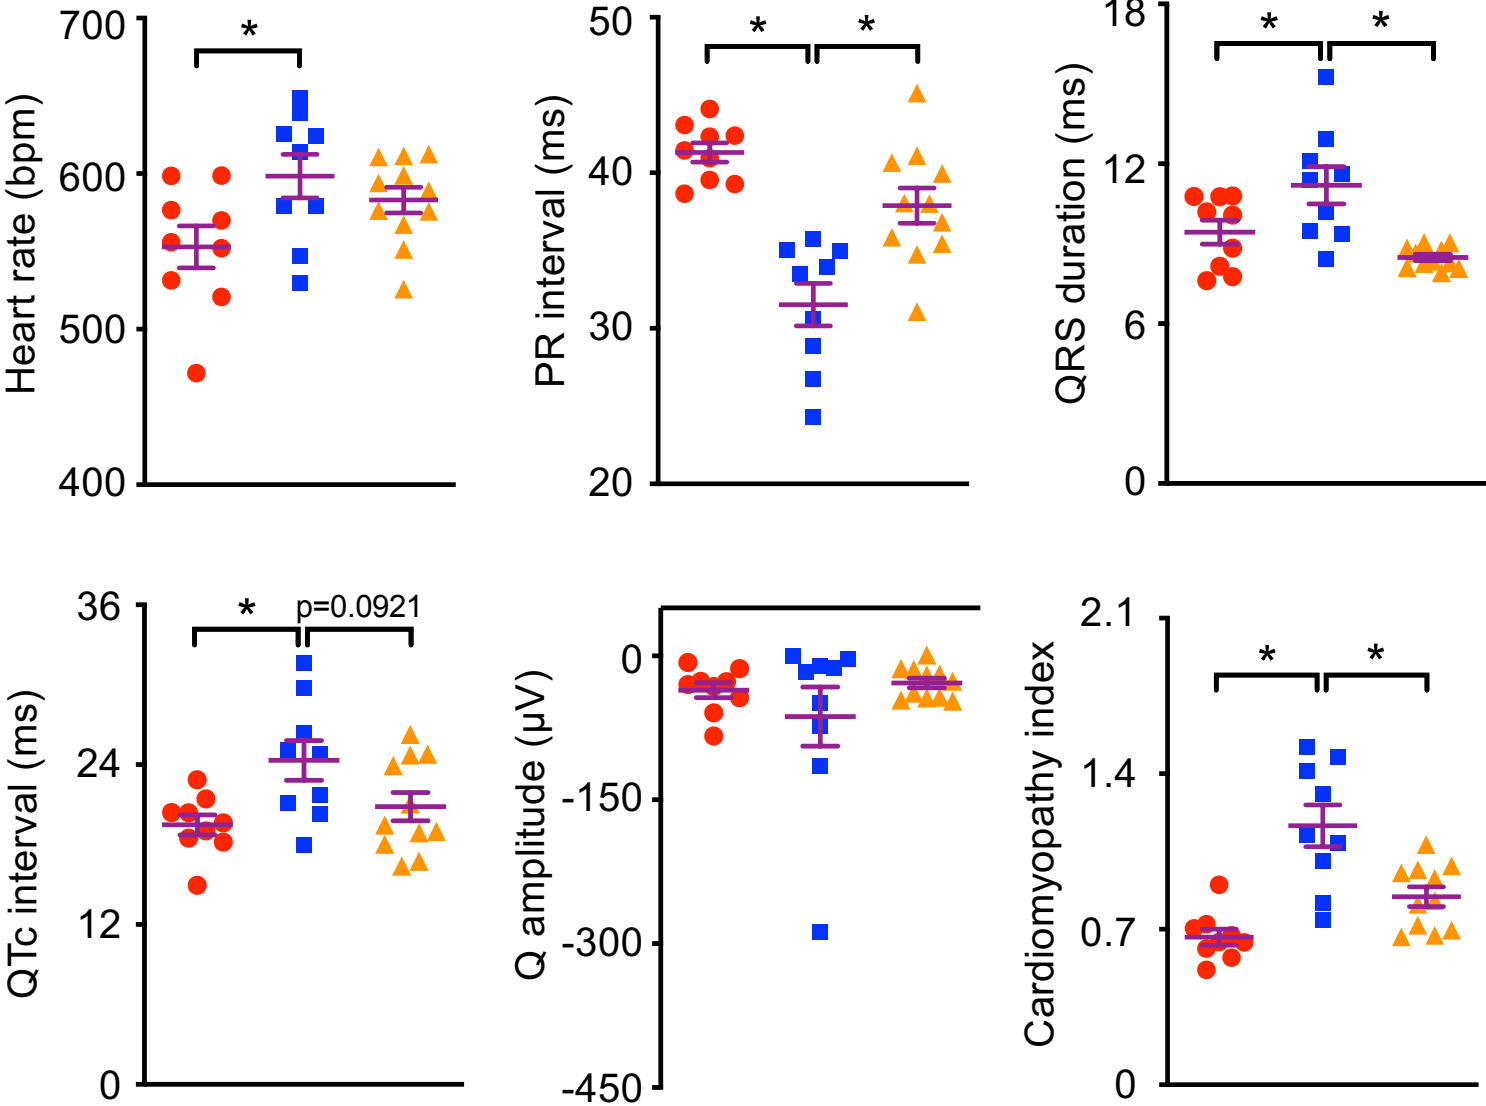

Supplement: Supp_FigS4.pdf [file Supp_FigS4.pdf]
