# Supplementary material
Source: PubMed Central journal article supplement (PMC10210228)
Supplement: Supp_TableS1.pdf [file Supp_TableS1.pdf]

**Supplementary Table 1. Additional left ventricle hemodynamic parameters**

|                                                            | Wild type                       | mdx                           | AAV. $\mu$ -dystrophin |
|------------------------------------------------------------|---------------------------------|-------------------------------|------------------------|
| Sample Size (N)                                            | 22                              | 18                            | 7                      |
| Body surface area (cm <sup>2</sup> )                       | 93.85 $\pm$ 1.83 <sup>a</sup>   | 76.53 $\pm$ 6.10              | 87.43 $\pm$ 2.38       |
| Stroke volume index (mL/m <sup>2</sup> )                   | 1.79 $\pm$ 0.12                 | 1.38 $\pm$ 0.11               | 1.65 $\pm$ 0.27        |
| Cardiac index (L/min/m <sup>2</sup> )                      | 1.10 $\pm$ 0.07 <sup>a</sup>    | 0.82 $\pm$ 0.06               | 0.97 $\pm$ 0.13        |
| Min P (mmHg)                                               | 2.95 $\pm$ 0.59                 | 3.34 $\pm$ 0.83               | 1.14 $\pm$ 0.07        |
| End systolic pressure (mmHg)                               | 96.59 $\pm$ 2.34                | 67.62 $\pm$ 4.79 <sup>b</sup> | 100.7 $\pm$ 2.70       |
| End diastolic pressure (mmHg)                              | 6.42 $\pm$ 0.72                 | 5.53 $\pm$ 0.95               | 4.95 $\pm$ 0.78        |
| Stroke work (KmmHg $\mu$ L)                                | 1.37 $\pm$ 0.09                 | 0.55 $\pm$ 0.05 <sup>b</sup>  | 1.10 $\pm$ 0.18        |
| Arterial elastance (mmHg/ $\mu$ L)                         | 6.09 $\pm$ 0.47                 | 6.39 $\pm$ 0.64               | 8.46 $\pm$ 1.12        |
| dV/dt max ( $\mu$ L/sec)                                   | 898.4 $\pm$ 58.1 <sup>a</sup>   | 681.4 $\pm$ 51.5              | 823.1 $\pm$ 129        |
| dV/dt min ( $\mu$ L/sec)                                   | -1023.6 $\pm$ 63.4 <sup>a</sup> | -790.9 $\pm$ 58.7             | -1012.0 $\pm$ 123.1    |
| <u>P@dV/dt max (mmHg)</u>                                  | 29.9 $\pm$ 6.20                 | 26.9 $\pm$ 5.50               | 28.45 $\pm$ 15.66      |
| <u>P@dP/dt max (mmHg)</u>                                  | 65.7 $\pm$ 2.00                 | 40.3 $\pm$ 3.67 <sup>b</sup>  | 68.82 $\pm$ 1.77       |
| <u>V@dP/dt max (<math>\mu</math>L)</u>                     | 22.3 $\pm$ 1.17                 | 27.8 $\pm$ 1.76 <sup>b</sup>  | 18.3 $\pm$ 1.46        |
| <u>V@dP/dt min (<math>\mu</math>L)</u>                     | 7.11 $\pm$ 0.66                 | 18.8 $\pm$ 1.54 <sup>b</sup>  | 7.04 $\pm$ 1.17        |
| Tau_W (msec)                                               | 4.93 $\pm$ 0.17                 | 7.95 $\pm$ 1.24 <sup>b</sup>  | 4.80 $\pm$ 0.20        |
| Max Power (mWatts)                                         | 11.48 $\pm$ 0.82                | 5.21 $\pm$ 0.38 <sup>b</sup>  | 11.15 $\pm$ 1.28       |
| Preload adjusted max power (mWatts/ $\mu$ L <sup>2</sup> ) | 282.6 $\pm$ 31.8                | 92.9 $\pm$ 17.4 <sup>b</sup>  | 386.6 $\pm$ 90.6       |

<sup>a</sup>, significantly different from mdx

<sup>b</sup>, significantly different from the other two groups

*Abbreviations:* **Min P**, minimum pressure; **dV/dt**, rate of left ventricular volume change; **dV/dt max**, maximum value of dV/dt during cardiac cycle; **dV/dt min**, minimum value of dV/dt during cardiac cycle; **P@dV/dt max**, pressure at dV/dt max; **dP/dt**, rate of left ventricular pressure change; **P@dP/dt max**, pressure at the maximum value of dP/dt during cardiac cycle; **V@dP/dt max**, volume at the dP/dt max; **V@dP/dt min**, volume at the dP/dt min; **Tau\_W**, isovolumic relaxation time (Weiss method); **Max power**, maximum value of the power during cardiac cycle (Power = pressure\*dV/dt)
