# Supplementary material
Source: PubMed Central journal article supplement (PMC10210228)
Supplement: Supp_TableS2.pdf [file Supp_TableS2.pdf]

**Supplementary Table 2. Anatomic properties of AAV9.μ-dystrophin treated mice**

|                 | Wild type                 | mdx          | AAV.μ-Dystrophin           |
|-----------------|---------------------------|--------------|----------------------------|
| Sample Size (N) | 22                        | 17           | 9                          |
| Age (m)         | 21.92 ± 0.42              | 21.16 ± 1.52 | 21.51 ± 1.79               |
| BW (g)          | 29.57 ± 0.88 <sup>a</sup> | 21.78 ± 1.59 | 25.90 ± 2.38               |
| HW (mg)         | 116.9 ± 1.68 <sup>a</sup> | 107.5 ± 9.67 | 116.8 ± 11.90              |
| VW (mg)         | 110.5 ± 1.50 <sup>a</sup> | 100.1 ± 9.58 | 111.9 ± 11.60 <sup>a</sup> |
| TL (mm)         | 18.51 ± 0.07              | 18.50 ± 2.17 | 18.59 ± 1.87               |
| HW/BW (mg/g)    | 4.02 ± 0.12 <sup>b</sup>  | 4.94 ± 1.08  | 4.52 ± 0.91                |
| HW/TL (mg/mm)   | 6.45 ± 0.11 <sup>a</sup>  | 5.68 ± 1.16  | 6.28 ± 0.62                |
| VW/BW (mg/g)    | 3.80 ± 0.11 <sup>b</sup>  | 4.66 ± 1.15  | 4.33 ± 0.86 <sup>b</sup>   |
| VW/TL (mg/mm)   | 6.09 ± 0.11 <sup>a</sup>  | 5.36 ± 1.15  | 6.01 ± 0.61                |

<sup>a</sup>, significantly different from mdx

<sup>b</sup>, significantly different from the other two groups

Abbreviations: **BW**, body weight; **HW**, heart weight; **VW**, ventricle weight; **TL**, tibia length
